11. Grol R, Grimshaw J: From best evidence to best practice: Effective implementation of change in patients' care. *Lancet* 2003; 362:1225-30
12. Baillard C, Clec'h C, Catineau J, Salhi F, Gehan G, Cupa M, Samama CM: Postoperative residual neuromuscular block: A survey of management. *Br J Anaesth* 2005; 95:622-6
13. Todd MM, Hindman BJ, King BJ: The implementation of quantitative electromyographic neuromuscular monitoring in an academic anesthesia department. *Anesth Analg* 2014; 119:323-31
14. U.S. Food and Drug Administration Advisory Committee: Schering-Plough Sugammadex NDA 22-225: Available at: <http://www.fda.gov/ohrms/dockets/ac/08/slides/2008-4346s1-01-Schering-Plough-corebackup.pdf>. 2008. Accessed May 11, 2016
15. Masursky D, Dexter F, Kwakye MO, Smallman B: Measure to quantify the influence of time from end of surgery to tracheal extubation on operating room workflow. *Anesth Analg* 2012; 115:402-6
16. Bayman EO, Dexter F, Todd MM: Prolonged operative time to extubation is not a useful metric for comparing the performance of individual anesthesia providers. *ANESTHESIOLOGY* 2016; 124:322-38
17. Epstein RH, Dexter F, Brull SJ: Cohort study of cases with prolonged tracheal extubation times to examine the relationship with duration of workday. *Can J Anaesth* 2013; 60:1070-6

## ANESTHESIOLOGY REFLECTIONS FROM THE WOOD LIBRARY-MUSEUM

### Richter's Anchor Pain Expeller: Nondoctor Analgesia from "Doctoring" Chili, Black, and Guinea Peppers

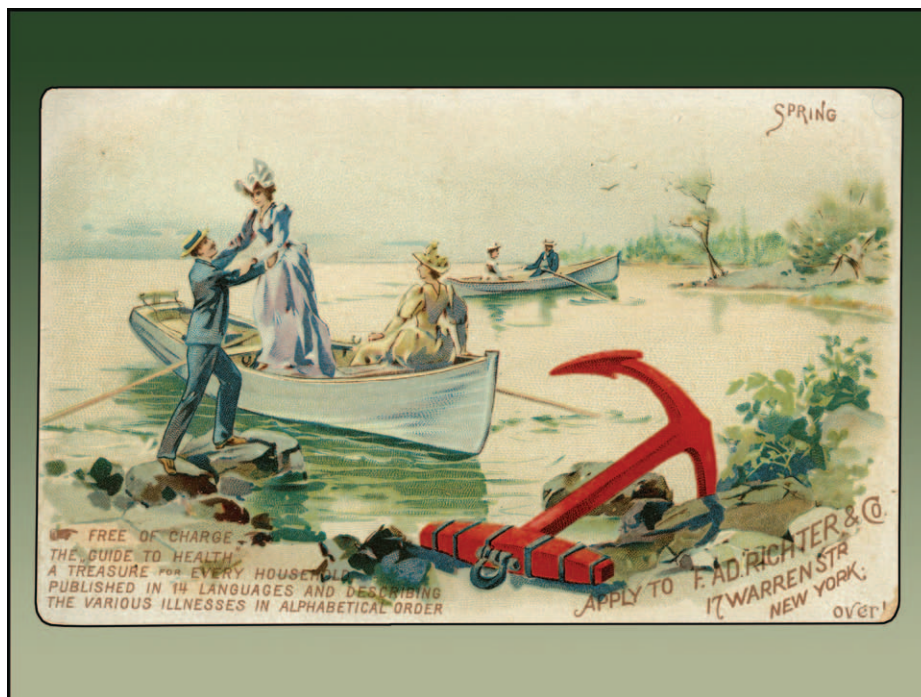

Friedrich Adolf Richter (1846 to 1910) was a German businessman who claimed to have earned an M.D. from the University of Philadelphia, a nonexistent institution. Inside Germany, he flouted the law by peddling his nostrums to consumers by mail order from his company, F. Ad. Richter & Cie, by a nonexistent pharmacy. Featuring the brand's iconic anchor, Richter's advertising to Americans promised pain relief from neuralgia and from "gout, rheumatism, backache, etc." This trade card (above) was issued on behalf of the New York branch of Richter's company. In follow-up newspaper testimonials, a New York County Clerk observed that "universal endorsement [implied that the remedy]...must effect the ends claimed." By 1907, analytical pharmacists had determined that nondoctor Richter had created his Anchor Pain Expeller by "doctoring" chili, black, and Guinea peppers with galangal root, astringent rhatany, and the oils of thyme, clove, rosemary, and lavender. Three years later, Richter passed away as one of Germany's ten wealthiest citizens. (Copyright © the American Society of Anesthesiologists' Wood Library-Museum of Anesthesiology.)

George S. Bause, M.D., M.P.H., Honorary Curator and Laureate of the History of Anesthesia, Wood Library-Museum of Anesthesiology, Schaumburg, Illinois, and Clinical Associate Professor, Case Western Reserve University, Cleveland, Ohio. [UJYC@aol.com](mailto:UJYC@aol.com).
